# Supplementary material
Source: PubMed Central journal article supplement (PMC9731250)
Supplement: 1007.pdf [file 1007.pdf]

**TABLE 1** Demographics of 21 glioma cases and results of scoring.

| Age | Sex | Location | Pathological diagnosis         | IDH1/2            | 1p/19q             | Cortical thickening ratio (Cutoff 1.5*) | Oligo/astro score Total (a/b/c) | Malignancy score Total (d/e/f) | WHO grade |
|-----|-----|----------|--------------------------------|-------------------|--------------------|-----------------------------------------|---------------------------------|--------------------------------|-----------|
| 81  | F   | Rt P     | GBM, IDH wildtype              | WT                | intact             | 1.27                                    | -3 (-1/-1/-1)                   | 2 (+1/+1/0)                    | IV        |
| 66  | F   | Lt thal  | GBM, IDH wildtype              | WT                | intact             | 0.98                                    | -3 (-1/-1/-1)                   | 3 (+1/+1/+1)                   | IV        |
| 63  | M   | Lt F     | GBM, IDH wildtype              | WT                | intact             | 1.01                                    | -3 (-1/-1/-1)                   | 3 (+1/+1/+1)                   | IV        |
| 60  | M   | Rt F     | GBM, IDH wildtype              | WT                | intact             | 0.94                                    | -3 (-1/-1/-1)                   | 3 (+1/+1/+1)                   | IV        |
| 60  | M   | Rt P     | GBM, IDH wildtype              | WT                | intact             | 1.08                                    | -3 (-1/-1/-1)                   | 3 (+1/+1/+1)                   | IV        |
| 41  | M   | Rt F     | GBM, IDH mutant                | <i>IDH1</i> R132H | intact             | 1.10                                    | -3 (-1/-1/-1)                   | 2.5 (+1/+1/+0.5)               | IV        |
| 29  | F   | Lt F     | GBM, IDH mutant                | <i>IDH1</i> R132H | Intact             | 1.35                                    | 0 (0/+1/-1)                     | 3 (+1/+1/+1)                   | IV        |
| 62  | F   | Rt F     | AA, IDH wildtype               | WT                | intact             | 1.42                                    | -3 (-1/-1/-1)                   | 0.5 (0/+0.5/0)                 | III       |
| 37  | F   | Rt F     | DA, IDH wildtype               | WT                | intact             | <b>6.97</b>                             | 1 (+1/+1/-1)                    | 0 (0/0/0)                      | II        |
| 35  | F   | Rt F     | DA, IDH wildtype               | WT                | intact             | 1.03                                    | -3 (-1/-1/-1)                   | 0 (0/0/0)                      | II        |
| 68  | M   | Lt P     | DA, IDH mutant                 | <i>IDH1</i> R132H | intact             | 0.87                                    | -1 (-1/0/0)                     | 1 (0/+1/0)                     | II        |
| 67  | F   | Rt T     | DA, IDH mutant                 | <i>IDH1</i> R132H | intact             | 1.12                                    | -3 (-1/-1/-1)                   | 0 (0/0/0)                      | II        |
| 55  | M   | Rt T     | DA, IDH mutant                 | <i>IDH1</i> R132H | intact             | 1.10                                    | -3 (-1/-1/-1)                   | 0 (0/0/0)                      | II        |
| 31  | F   | Rt F     | DA, IDH mutant (19q del)       | <i>IDH1</i> R132H | 1p intact, 19q del | <b>1.64</b>                             | 3 (+1/+1/+1)                    | 1 (0/+1/0)                     | II        |
| 68  | M   | Lt F     | AOD, IDH mutant + 1p/19q codel | <i>IDH1</i> R132H | codel              | <b>3.93</b>                             | 3 (+1/+1/+1)                    | 2 (+1/+1/0)                    | III       |
| 40  | M   | Lt F     | AOD, IDH mutant + 1p/19q codel | <i>IDH1</i> R132H | codel              | <b>2.58</b>                             | 3 (+1/+1/+1)                    | 1.5 (+1/0.5/0)                 | III       |
| 34  | M   | Lt P     | AOD, IDH mutant +1p/19q codel  | <i>IDH1</i> R132H | codel              | <b>1.95</b>                             | 2 (+1/0/+1)                     | 1.5 (+1/+0.5/0)                | III       |
| 49  | M   | Lt T     | OD, IDH mutant + 1p/19q codel  | <i>IDH1</i> R132H | codel              | 1.01                                    | -1(-1/-1/+1)                    | 0 (0/0/0)                      | II        |
| 43  | M   | Rt F     | OD, IDH mutant + 1p/19q codel  | <i>IDH1</i> R132H | codel              | <b>1.50</b>                             | 3 (+1/+1/+1)                    | 0 (0/0/0)                      | II        |
| 30  | F   | Rt F     | OD, IDH mutant + 1p/19q codel  | <i>IDH2</i> R172W | codel              | 1.18                                    | -1 (-1/-1/+1)                   | 0 (0/0/0)                      | II        |
| 26  | F   | Rt F     | OD, IDH mutant + 1p/19q codel  | <i>IDH1</i> R132H | codel              | <b>1.83</b>                             | 3 (+1/+1/+1)                    | 0 (0/0/0)                      | II        |

AA: anaplastic astrocytoma, AOD: anaplastic oligodendroglioma, DA: diffuse astrocytoma, F: female, GBM: glioblastoma, Lt: left, M: male, OD: oligodendroglioma, Rt: right, T: temporal, thal: thalamus, WT: wildtype, WHO: World Health Organization

a/b/c: cortical thickening (Yes +1/No -1)/displacement of medullary vessels (Yes +1/No -1)/ cortical tapering (Yes -1/No +1)

d/e/f: thickening of medullary vessels (Yes +1/No 0)/microbleeds (Yes +1/No 0)/necrosis (Yes +1/No 0)

\* Cortical thickening ratio  $\geq 1.5$  in bold.
